# Supplementary material
Source: Royal Society of Chemistry journal article supplement (doi:10.1039/d5ay02138c)
Supplement: d5ay02138c1.pdf [file d5ay02138c1.pdf]

## ***Supplementary material***

### **Rapid quantification of oxidation indicators in fish oil by digital image colorimetry**

Xianggang Yin<sup>a</sup>, Xiaohan Zhao<sup>a</sup>, Xin Chen<sup>a</sup>, Jiayi Jiang<sup>a</sup>, Lele Li<sup>a</sup>, Qinting Jiang<sup>b</sup>  
Linlin Wu<sup>a\*</sup>, Yifeng Zhou<sup>a\*</sup>, Jun Huang<sup>a</sup>

<sup>a</sup>School of Biological and Chemical Engineering, Zhejiang University of Science and Technology, Hangzhou 310023, China.

<sup>b</sup>Zhejiang Academy of Science & Technology for Inspection & Quarantine, Hangzhou 310016, China.

\*Corresponding author

*E-mail addresses:* wull815@zust.edu.cn (Linlin Wu), yfzhou@zust.edu.cn (Yifeng Zhou).

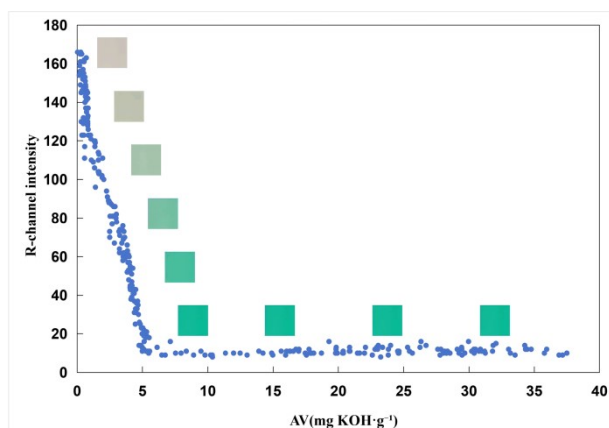

Figure S1 Relationship between acid value and R-channel intensity in the reaction images, and visualization of the color-change threshold used to distinguish low and high oxidation levels.

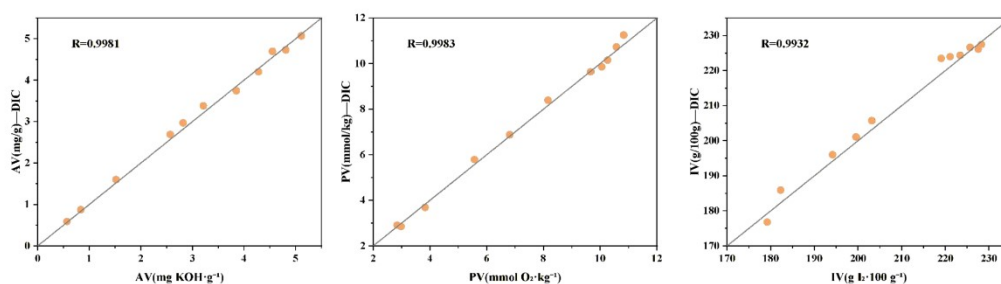

Figure S2 Correlation between oxidation indicators predicted by digital image colorimetry and values measured by titrimetric methods for real oxidized fish oil samples.



Table S1 Comparison of reagent volume and analysis time between DIC and titrimetric methods.

| AV                                 |                    |            | PV                                   |                    |            | IV                                   |                    |            |
|------------------------------------|--------------------|------------|--------------------------------------|--------------------|------------|--------------------------------------|--------------------|------------|
| Reagent                            | Titrimetric method | DIC method | Reagent                              | Titrimetric method | DIC method | Reagent                              | Titrimetric method | DIC method |
| Ether                              | 50 ml              | 0          | Chloroform                           | 15 ml              | 0          | Cyclohexane                          | 10 ml              | 1 ml       |
| Isopropanol                        | 50 ml              | 0          | Isooctane                            | 0                  | 0.8 ml     | glacial acetic acid                  | 10 ml              | 1 ml       |
| Cyclohexane                        | 0                  | 4 ml       | glacial acetic acid                  | 15 ml              | 1.2 ml     | Wijs reagent                         | 25 ml              | 2.5 ml     |
| Phenolphthalein                    | 0.1 ml             | 0          | Potassium iodide                     | 1 ml               | 0.1 ml     | Potassium iodide                     | 20 ml              | 2 ml       |
| Copper soap staining solution      | 0                  | 2 ml       | Water                                | 100 ml             | 0          | Water                                | 150 ml             | 5 ml       |
| -                                  | -                  | -          | Starch solution                      | 0.5 ml             | 0          | Starch solution                      | 0.5 ml             | 0          |
| Sodium hydroxide standard solution | to endpoint        | 0          | Sodium thiosulfate solution          | to endpoint        | 0          | Sodium thiosulfate solution          | to endpoint        | 0          |
| Total (excluding sodium hydroxide) | 100.1 ml           | 6 ml       | Total (excluding sodium thiosulfate) | 131.5 ml           | 2.1 ml     | Total (excluding sodium thiosulfate) | 215 ml             | 11.5 ml    |
| Time                               | 25 min             | 4 min      | Time                                 | 30 min             | 4 min      | Time                                 | 120 min            | 10 min     |
